# Supplementary material for: Experimental Early Stimulation of Bone Tissue Neo-Formation for Critical Size Elimination Defects in the Maxillofacial Region
Source: Preprints.org preprint supplement (doi:10.20944/preprints202308.1032.v2), 2023-10-06
Supplement: Supplementary file 1 [file supplementary]

**Table 3.** Histomorphometric criteria for the repair of a bone defect within 6-10 weeks after construct implantation (Me[25;75]).

|  | | | | Area of mandibular defect | | | | | | | |  | | |
| --- | --- | --- | --- | --- | --- | --- | --- | --- | --- | --- | --- | --- | --- | --- |
| Experiment period | | | | Experience  CH-SA-HA1 | | | | Control  Healing under a blood clot1 | | | | Defect periphery1  Control + experience | | |
| Volumetric density of bone tissue (BV %) | | | | | | | | | | | | | | | | |
| 6 weeks1 | | | 67,5[65,4;68,6] | | | | 62,6[60,0;64,2]** | | 68,7[67,2;69,8]* | | | | | | |
| 8 weeks | | | 67,1[63,2;69,1] | | | | 65,2[63,4;69,2] | | 67,0[65,4;68,5] | | | | | | |
| 10 weeks | | | 67,3[65,1;68,2] | | | | 68,3[66,6;69,2] | | 67,8[66,3;69,2] | | | | | | |
| Trabeculae thickness (TT mm) | | | | | | | | | | | | | | | | |
| 6 weeks | | | 0,16[0,15;0,17] | | | | 0,16[0,15;0,16] | | | 0,15[0,14;0,17] | | | | | | |
| 8 weeks1 | | | 0,16[0,15;0,16] | | | | 0,15[0,14;0,16]* | | | 0,15[0,14;0,15] | | | | | | |
| 10 weeks | | | 0,16[0,16;0,17] | | | | 0,16[0,15;0,17] | | | 0,16[0,16;0,17] | | | | | | |
| Intertrabecular spaces (ITS mm) | | | | | | | | | | | | | | | | |
| 6 weeks1 | | 0,21[0,19;0,22] | | | | | 0,21[0,20;0,22] | | | 0,19[0,18;0,20]** | | | | | | |
| 8 weeks1 | | 0,20[0,19;0,20] | | | | | 0,21[0,19;0,21] | | | 0,19[0,18;0,19]** | | | | | | |
| 10 weeks1 | | 0,20[0,19;0,20] | | | | | 0,22[0,21;0,23] | | | 0,18[0,17;0,20]** | | | | | | |
| Osteoblastic surface (OS %) | | | | | | | | | | | | | | | | |
|  | 6 weeks1 | 20,2[19,0;21,5] | | | | | 16,4[14,9;18,0]** | | | 4,0[2,8;4,7]** | | | | | | |
|  | 8 weeks1 | 8,7[8,1;9,9] | | | | | 8,4[7,1;9,6] | | | 1,5[1,3;1,8]* | | | | | | |
|  | 10 weeks1 | 3,6[2,8;4,0] | | | | | 5,0[3,6;6,1]** | | | 1,6[1,1;1,9]** | | | | | | |
| Erosed bone surface (ES %) | | | | | | | | | | | | | | | | |
| 6 weeks1 | 4,8[4,6;4,9] | | | 5,1[4,7;5,6] | | | | | | 0,8[0,7;0,9]** | | |
| 8 weeks1 | 2,6[2,5;2,8] | | | 3,1[3,0;3,4]** | | | | | | 0,7[0,5;0,9]** | | |
| 10 weeks1 | 1,6[1,5;1,7] | | | 1,3[1,2;1,4]** | | | | | | 0,9[0,8;0,9]** | | |
| Bone growth rate (% per day) | | | | | | | | | | | | | | | | | | |
| 1-28 days | | | 2,24[2,17;2,39] | | | | 2,17[2,07;2,21]** | | | | | | |
| 6-14 days | | | 28,9 [26,3;30,4] | | | | 27,2 [25,2;29,0]** | | | | | | |
| 15-28 days | | | 3,23[2,85;3,36] | | | | 3,15[2,64;3,52] | | | | | | |
| 29-70 days | | | 0,96[0,92;0,97] | | | | 0,97[0,95;0,99] | | | | | | |
| 1-70 days  (total) | | | 0,94[0,82;1,25] | | | | 0,96[0,85;1,15] | | | | | | |

* Differences are reliable with the CH-SA-HA group (p<0.05)

**Differences are reliable when compared with the CH-SA-HA group (p<0.01)

1Significant differences in multiple comparisons ANOVA (p<0.001)
