# Supplementary material for: Experimental Early Stimulation of Bone Tissue Neo-Formation for Critical Size Elimination Defects in the Maxillofacial Region
Source: Preprints.org preprint supplement (doi:10.20944/preprints202308.1032.v2), 2023-10-06
Supplement: Supplementary file 2 [file Table 1.docx]

**Table 1.** Histomorphometric criteria for the repair of a bone defect in the lower jaw of rats at an early follow-up (Me[25;75]).

|  | Area of mandibular defect | |  |
| --- | --- | --- | --- |
| Experiment period | Experience  CH-SA-HA1 | Control  Healing under a blood clot1 | Defect periphery1  Control + experience |

Numerical density of inflammatory infiltrate (unit/0.043 mm2)

| 3 day1 | | | | 56,1[46,4;67,6] | | | | 67,4[57,6;72,1]** | 9,3[7,9;9,7]** | | | |
| --- | --- | --- | --- | --- | --- | --- | --- | --- | --- | --- | --- | --- |
| 5 day1 | | | | 85,7[72,1;90,7] | | | | 93,7[86,1;99,4]** | 14,6[13,4;15,7]** | | | |
| 7 day1 | | | | 88,1[74,6;91,9] | | | | 91,4[81,5;99,4]** | 11,3[10,1;12,3]** | | | |
| Volumetric density of bone tissue (BV (%) | | | | | | | | | | | | |
| 5 day1 | | | | 1,1[0,9;1,3] | | | | 1,1[0,8;1,5] | 65,3[64,2;66,4]** | | | |
| 7 day1 | | | | 15,1[13,0;16,7] | | | | 16,2[14,9;17,9] | 66,5[65,6;68,8]** | | | |
| Trabeculae thickness (mm) | | | | | | | | | | | | |
| 5 day1 | | | | 0,04[0,03;0,05] | | | | 0,04[0,04;0,05] | 0,15[0,15;0,16]** | | | |
| 7 day1 | | | | 0,06[0,05;0,07] | | | | 0,06[0,05;0,06] | 0,15[0,15;0,16]** | | | |
| Intertrabecular spaces (mm) | | | | | | | | | | | | |
| 5 day1 | | | | 0,61[0,60;0,63] | | 0,61[0,59;0,63] | | | | 0,21[0,21;0,23]** | |
| 7 day1 | | | | 0,43[0,42;0,45] | | 0,43[0,43;0,45] | | | | 0,20[0,19;0,21]** | |
| Osteoblastic surface (%) | | | | | | | | | | | |
|  | | 5 day1 | | | 70,5[66,4;74,8] | 64,3[62,0;67,1]** | | | | | 25,3[24,0;26,4]** |
|  | | 7 day1 | | | 65,6[63,2;68,5] | 59,2[57,9;60,2]** | | | | | 21,8[20,2;23,5]** |
| Erosed bone surface (%) | | | | | | | | | | | |
|  |  | 5 day1 | | | 0,8[0,7;0,9] | 1,0[0,9;1,1]** | | | 12,0[11,3;13,3]** | | |
|  |  | 7 day1 | | | 1,5[1,4;1,8] | 1,9[1,6;2,1]** | | | 7,9[7,7;8,0]** | | |

**Differences are reliable when compared with the CH-SA-HA group (p<0.01)

1Significant differences in multiple comparisons ANOVA (p<0.001)
